# Supplementary material
Source: MDPI journal article supplement (https://www.mdpi.com/2673-4141/3/2/16)
Supplement: s1 [file s1]

# Supplementary Information

## Hydrogen storage properties of a new Ti-V-Cr-Zr-Nb high entropy alloy

*Anis Bouzidi<sup>1</sup>, Laetitia Laversenne<sup>2</sup>, Vivian Nassif<sup>2</sup>, Erik Elkaim<sup>3</sup>, Claudia Zloted<sup>1\*</sup>*

<sup>1</sup>*Université Paris Est Créteil, CNRS, ICMPE, UMR 7182, 2 rue Henri Dunant, 94320 Thiais, France*

<sup>2</sup>*University Grenoble Alpes, CNRS, Institut Néel, 38000 Grenoble, France*

<sup>3</sup>*Synchrotron SOLEIL, L'Orme des Merisiers, Saint-Aubin, 91192 Gif sur Yvette Cedex, France*

**Figure SI-1.** Structural analysis (phase fractions and corresponding lattice parameters) of the  $\text{Ti}_{0.30}\text{V}_{0.25}\text{Cr}_{0.10}\text{Zr}_{0.10}\text{Nb}_{0.25}\text{H}_x$  ( $x = 0.3; 0.8; 1.3$ ) and the desorbed phase.

**Table SI-1.** Crystallographic information of the SR-XRD of the desorbed  $\text{Ti}_{0.30}\text{V}_{0.25}\text{Cr}_{0.10}\text{Zr}_{0.10}\text{Nb}_{0.25}$  sample.

**Table SI-2.** Crystallographic information of the SR-XRD of the  $\text{Ti}_{0.30}\text{V}_{0.25}\text{Cr}_{0.10}\text{Zr}_{0.10}\text{Nb}_{0.25}\text{H}_{0.3}$  hydride.

**Table SI-3.** Crystallographic information of the SR-XRD of the  $\text{Ti}_{0.30}\text{V}_{0.25}\text{Cr}_{0.10}\text{Zr}_{0.10}\text{Nb}_{0.25}\text{H}_{0.8}$  hydride.

**Table SI-4.** Crystallographic information of the SR-XRD of the  $\text{Ti}_{0.30}\text{V}_{0.25}\text{Cr}_{0.10}\text{Zr}_{0.10}\text{Nb}_{0.25}\text{H}_{1.3}$  hydride.

**Figure SI-2.** X-ray diffraction pattern after 20 absorption/desorption cycles ( $\lambda = 1.5406 \text{ \AA}$ ) of the hydride  $\text{Ti}_{0.30}\text{V}_{0.25}\text{Cr}_{0.10}\text{Zr}_{0.10}\text{Nb}_{0.25}\text{H}_{1.53}$ .

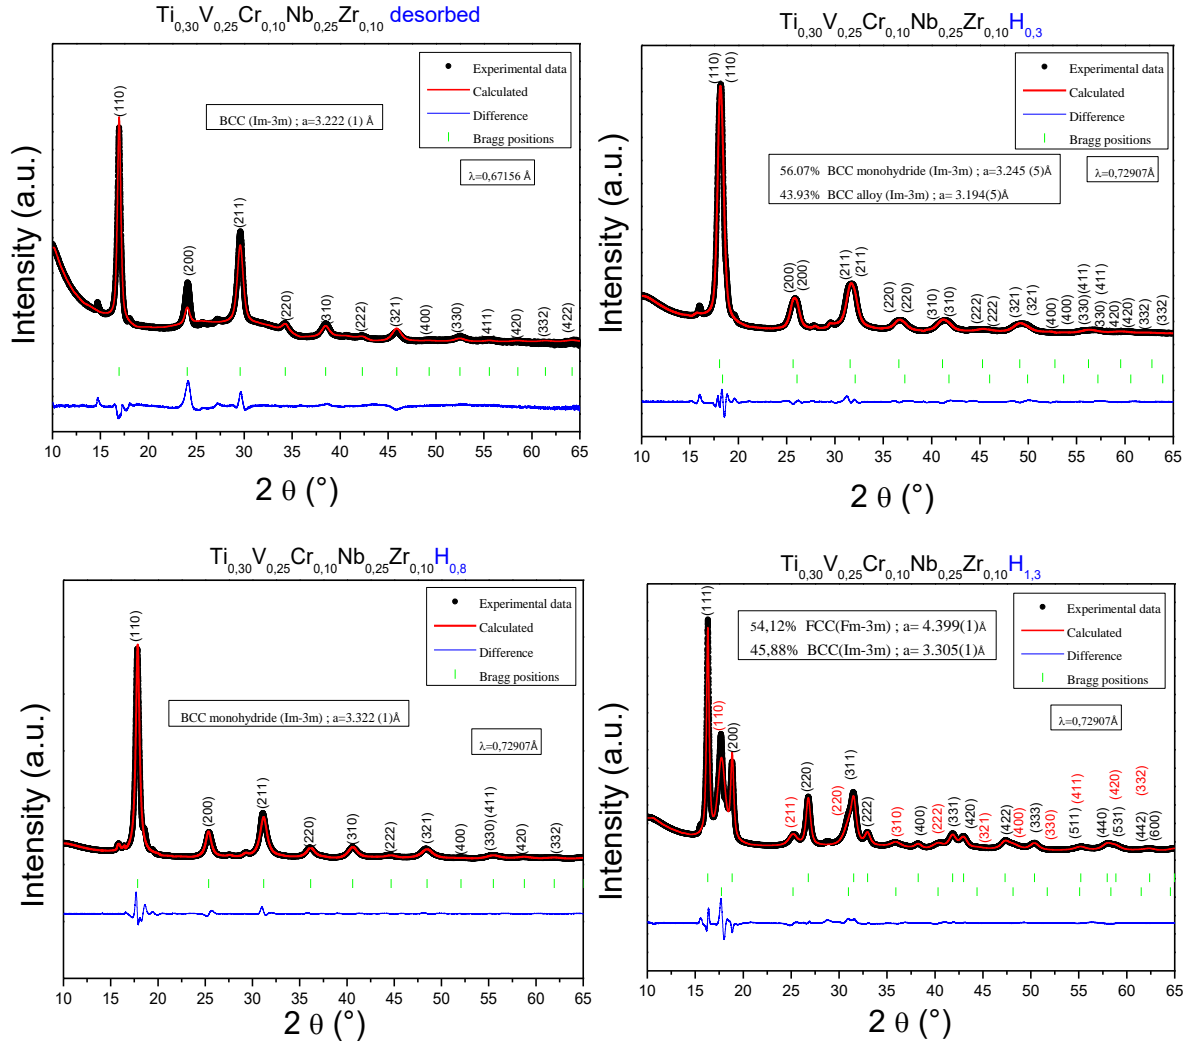

**Figure SI-1.** Structural analysis of the SR-XRD (phase fractions and corresponding lattice parameters) of the  $\text{Ti}_{0.30}\text{V}_{0.25}\text{Cr}_{0.10}\text{Zr}_{0.10}\text{Nb}_{0.25}\text{H}_x$  ( $x = 0.3; 0.8; 1.3$ ) and the desorbed phase.

| Composition                                                                                     | <i>fcc</i><br>dihydride<br>lattice<br>parameter<br>(Å) | phase<br>fraction<br>(%) | <i>bcc</i><br>monohydride<br>lattice<br>parameter<br>(Å) | phase<br>fraction<br>(%) | <i>bcc</i><br>(desorbed)<br>lattice<br>parameter<br>(Å) | phase<br>fraction<br>(%) | $R_B$ | $\chi^2$ |
|-------------------------------------------------------------------------------------------------|--------------------------------------------------------|--------------------------|----------------------------------------------------------|--------------------------|---------------------------------------------------------|--------------------------|-------|----------|
| $\text{Ti}_{0.30}\text{V}_{0.25}\text{Cr}_{0.10}\text{Zr}_{0.10}\text{Nb}_{0.25}$<br>(Desorbed) | -                                                      | -                        | -                                                        | -                        | 3.222 (2)                                               | 100                      | 11.1  | 23.<br>2 |
| Position                                                                                        | -                                                      |                          | -                                                        |                          | (0 ; 0 ; 0)                                             |                          |       |          |
| Elements                                                                                        | Ti                                                     | V                        | Cr                                                       | Nb                       | Zr                                                      |                          |       |          |
| Occupancy                                                                                       | 30%                                                    | 25%                      | 10%                                                      | 25%                      | 10%                                                     |                          |       |          |

**Table SI-1.** Crystallographic information of the SR-XRD of the desorbed  $\text{Ti}_{0.30}\text{V}_{0.25}\text{Cr}_{0.10}\text{Zr}_{0.10}\text{Nb}_{0.25}$  sample.

| Composition                                                                                                 | <i>fcc</i><br><i>dihydride</i><br>lattice<br>parameter<br>(Å) | <i>phase</i><br><i>fraction</i><br>(%) | <i>bcc</i><br><i>monohydride</i><br>lattice<br>parameter<br>(Å) | <i>phase</i><br><i>fraction</i><br>(%) | $R_B$ | <i>bcc</i><br><i>(desorbed)</i><br>lattice<br>parameter<br>(Å) | <i>phase</i><br><i>fraction</i><br>(%) | $R_B$ | $\chi^2$ |
|-------------------------------------------------------------------------------------------------------------|---------------------------------------------------------------|----------------------------------------|-----------------------------------------------------------------|----------------------------------------|-------|----------------------------------------------------------------|----------------------------------------|-------|----------|
| Ti <sub>0.30</sub> V <sub>0.25</sub> Cr <sub>0.10</sub> Zr <sub>0.10</sub> Nb <sub>0.25</sub><br>(H/M= 0.3) | -                                                             | -                                      | 3.245 (5)                                                       | 56                                     | 1.82  | 3.194 (5)                                                      | 44                                     | 1.31  | 15.6     |
| Position                                                                                                    | -                                                             |                                        | (0 ; 0 ; 0)                                                     |                                        |       | (0 ; 0 ; 0)                                                    |                                        |       |          |
| Elements                                                                                                    | Ti                                                            | V                                      | Cr                                                              | Nb                                     |       | Zr                                                             |                                        |       |          |
| Occupancy                                                                                                   | 30%                                                           | 25%                                    | 10%                                                             | 25%                                    |       | 10%                                                            |                                        |       |          |

**Table SI-2.** Crystallographic information of the SR-XRD of the Ti<sub>0.30</sub>V<sub>0.25</sub>Cr<sub>0.10</sub>Zr<sub>0.10</sub>Nb<sub>0.25</sub>H<sub>0.3</sub> hydride.

| Composition                                                                                                 | <i>fcc</i><br><i>dihydride</i><br>lattice<br>parameter<br>(Å) | <i>phase</i><br><i>fraction</i><br>(%) | <i>bcc</i><br><i>monohydride</i><br>lattice<br>parameter<br>(Å) | <i>phase</i><br><i>fraction</i><br>(%) | $R_B$ | <i>bcc</i><br><i>(desorbed)</i><br>lattice<br>parameter<br>(Å) | <i>phase</i><br><i>fraction</i><br>(%) | $\chi^2$ |
|-------------------------------------------------------------------------------------------------------------|---------------------------------------------------------------|----------------------------------------|-----------------------------------------------------------------|----------------------------------------|-------|----------------------------------------------------------------|----------------------------------------|----------|
| Ti <sub>0.30</sub> V <sub>0.25</sub> Cr <sub>0.10</sub> Zr <sub>0.10</sub> Nb <sub>0.25</sub><br>(H/M= 0.8) | -                                                             | -                                      | 3.322 (1)                                                       | 100                                    | 1.38  | -                                                              | -                                      | 25.6     |
| Position                                                                                                    | -                                                             |                                        | (0 ; 0 ; 0)                                                     |                                        |       | -                                                              |                                        |          |
| Elements                                                                                                    | Ti                                                            | V                                      | Cr                                                              | Nb                                     |       | Zr                                                             |                                        |          |
| Occupancy                                                                                                   | 30%                                                           | 25%                                    | 10%                                                             | 25%                                    |       | 10%                                                            |                                        |          |

**Table SI-3.** Crystallographic information of the SR-XRD of the Ti<sub>0.30</sub>V<sub>0.25</sub>Cr<sub>0.10</sub>Zr<sub>0.10</sub>Nb<sub>0.25</sub>H<sub>0.8</sub> hydride.

| Composition                                                                                                 | <i>fcc</i><br><i>dihydride</i><br><i>lattice</i><br><i>parameter</i><br>(Å) | <i>phase</i><br><i>fraction</i><br>(%) | <i>R<sub>B</sub></i> | <i>bcc</i><br><i>monohydride</i><br><i>lattice</i><br><i>parameter</i><br>(Å) | <i>phase</i><br><i>fraction</i><br>(%) | <i>R<sub>B</sub></i> | <i>bcc</i><br><i>(desorbed)</i><br><i>lattice</i><br><i>parameter</i><br>(Å) | <i>phase</i><br><i>fraction</i><br>(%) | <i>χ<sup>2</sup></i> |
|-------------------------------------------------------------------------------------------------------------|-----------------------------------------------------------------------------|----------------------------------------|----------------------|-------------------------------------------------------------------------------|----------------------------------------|----------------------|------------------------------------------------------------------------------|----------------------------------------|----------------------|
| Ti <sub>0.30</sub> V <sub>0.25</sub> Cr <sub>0.10</sub> Zr <sub>0.10</sub> Nb <sub>0.25</sub><br>(H/M= 1.3) | 4.399 (1)                                                                   | 54                                     | 2.71                 | 3.305 (1)                                                                     | 46                                     | 4.09                 | -                                                                            | -                                      | 23.4                 |
| Position                                                                                                    | (0 ; 0 ; 0)                                                                 |                                        |                      | (0 ; 0 ; 0)                                                                   |                                        |                      | -                                                                            |                                        |                      |
| Elements                                                                                                    | Ti                                                                          | V                                      |                      | Cr                                                                            |                                        | Nb                   |                                                                              | Zr                                     |                      |
| Occupancy                                                                                                   | 30%                                                                         | 25%                                    |                      | 10%                                                                           |                                        | 25%                  |                                                                              | 10%                                    |                      |

**Table SI-4.** Crystallographic information of the SR-XRD of the Ti<sub>0.30</sub>V<sub>0.25</sub>Cr<sub>0.10</sub>Zr<sub>0.10</sub>Nb<sub>0.25</sub>H<sub>1.3</sub> hydride.

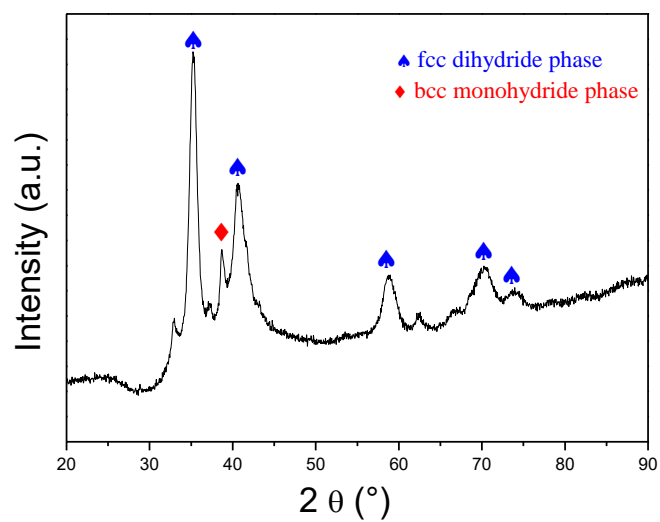

**Figure SI-2.** X-ray diffraction pattern after 20 absorption/desorption cycles ( $\lambda = 1.5406 \text{ \AA}$ ) of the hydride  $\text{Ti}_{0.30}\text{V}_{0.25}\text{Cr}_{0.10}\text{Zr}_{0.10}\text{Nb}_{0.25}\text{H}_{1.53}$ .
